# Supplementary material for: Insect anal droplets contain diverse proteins related to gut homeostasis
Source: BMC Genomics. 2018 Oct 30;19:784. doi: 10.1186/s12864-018-5182-z (PMC6208037; doi:10.1186/s12864-018-5182-z)
Supplement: Supplementary file 2 — Table S2. KEGG enrichment analysis based on the homologous genes of Dendroctonus ponderosae. KEGG enrichment analysis was used to annotate identified proteins by LC-MS. The table only contains those pathways related to innate immunity. (XLS 16 kb) [file 12864_2018_5182_MOESM2_ESM.xls]

## Sheet: Sheet1
Table S2: KEGG enrirchment analysis based on the homologous genes of Dendroctonus ponderosae
KEGG pathway ID	Pvalue	OddsRatio	ExpCount	Count	Size	enriched gene IDs of Dendroctonus ponderosae	enriched KEGG k numbers	names of enriched genes	EC numbers of enriched genes	enriched KEGG pathway A	enriched KEGG pathway B	enriched KEGG pathway C	URL
ko04142	0.409138	1.11464	10.9112	12	144	109545855;109533489;109544588;109545986;109535944;109541925;109545004;109533723;109545478;109538686;109542631;109536146	K01195;K01204;K01195;K01365;K01363;K12311;K01052;K01365;K12404;K12311;K01192;K12350	uidA;NAGA;uidA;CTSL;CTSB;MAN2B1;LIPA;CTSL;GGA;MAN2B1;E3.2.1.25;SMPD1	EC:3.2.1.31;EC:3.2.1.49;EC:3.2.1.31;EC:3.4.22.15;EC:3.4.22.1;EC:3.2.1.24;EC:3.1.1.13;EC:3.4.22.15;NA;EC:3.2.1.24;EC:3.2.1.25;EC:3.1.4.12	Cellular Processes	Transport and catabolism	Lysosome	http://www.kegg.jp/kegg-bin/show_pathway?@ko04142/reference%3dwhite/default%3d%23bfffbf/K01195/K01204/K01195/K01365/K01363/K12311/K01052/K01365/K12404/K12311/K01192/K12350
ko04144	0.204144	1.33996	10.0777	13	133	109546256;109544450;109537690;109538058;109541018;109538059;109537903;109537897;109542624;109538125;109540924;109534204;109536606	K03283;K12182;K11981;K03283;K12495;K03283;K11247;K12484;K12475;K03283;K12483;K12494;K12480	HSPA1s;HGS;RNF41;HSPA1s;IQSEC;HSPA1s;SH3GL;RAB11FIP1_2_5;DAB2;HSPA1s;EHD1;PSD;RABEP1	NA;NA;EC:2.3.2.27;NA;NA;NA;NA;NA;NA;NA;NA;NA;NA	Cellular Processes	Transport and catabolism	Endocytosis	http://www.kegg.jp/kegg-bin/show_pathway?@ko04144/reference%3dwhite/default%3d%23bfffbf/K03283/K12182/K11981/K03283/K12495/K03283/K11247/K12484/K12475/K03283/K12483/K12494/K12480
ko04145	0.0750456	1.73223	6.81948	11	90	109536631;109536634;109545986;109541391;109544554;109533723;109544131;109534068;109538069;109544450;109535999	K05692;K05692;K01365;K08517;K05719;K01365;K05692;K04659;K05692;K12182;K02148	ACTB_G1;ACTB_G1;CTSL;SEC22;ITGB1;CTSL;ACTB_G1;THBS2S;ACTB_G1;HGS;ATPeV1C	NA;NA;EC:3.4.22.15;NA;NA;EC:3.4.22.15;NA;NA;NA;NA;NA	Cellular Processes	Transport and catabolism	Phagosome	http://www.kegg.jp/kegg-bin/show_pathway?@ko04145/reference%3dwhite/default%3d%23bfffbf/K05692/K05692/K01365/K08517/K05719/K01365/K05692/K04659/K05692/K12182/K02148
ko04310	0.480242	1.08324	6.5164	7	86	109544371;109542096;109536345;109546340;109538975;109539926;109540927	K02105;K04499;K00572;K04506;K02157;K05858;K03097	CTNNB1;RUVBL1;WNT7;SIAH1;AXIN1;PLCB;CSNK2A	NA;NA;NA;EC:2.3.2.27;NA;EC:3.1.4.11;EC:2.7.11.1	Environmental Information Processing	Signal transduction	Wnt signaling pathway	http://www.kegg.jp/kegg-bin/show_pathway?@ko04310/reference%3dwhite/default%3d%23bfffbf/K02105/K04499/K00572/K04506/K02157/K05858/K03097
ko04624	0.0552854	2.22533	3.48551	7	46	109538735;109540911;109537660;109538307;109544544;109540445;109538280	K04734;K20699;K04730;K18809;K20671;K20703;K04404	NFKBIA;IMD;IRAK1;TL;PSH;FAF1;MAP3K7IP2	NA;NA;EC:2.7.11.1;NA;EC:3.4.21.-;NA;NA	Organismal Systems	Immune system	Toll and Imd signaling pathway	http://www.kegg.jp/kegg-bin/show_pathway?@ko04624/reference%3dwhite/default%3d%23bfffbf/K04734/K20699/K04730/K18809/K20671/K20703/K04404
